# Supplementary material
Source: publisher figshare collection journal article supplement (https://acs.figshare.com/ndownloader/files/29101365)
Supplement: Supplementary file 1 [file 29101365]

# Supporting Information: Area-Type Electronic Bipolar Switching Al/TiO<sub>1.7</sub>/TiO<sub>2</sub>/Al Memory with Linear Potentiating and Depressing Characteristics

*Yu Yan,<sup>1</sup> Jia Cheng Li,<sup>1</sup> Yu Ting Chen,<sup>1</sup> Xiang Yu Wang,<sup>1</sup> Gang Ri Cai,<sup>2</sup> Hyeon Woo Park,<sup>3</sup> Ji Hun Kim,<sup>3</sup> Jin Shi Zhao<sup>\*,1</sup> and Cheol Seong Hwang<sup>\*,3</sup>*

<sup>1</sup> Tianjin Key Laboratory of Film Electronic & Communication Devices, School of Integrated Circuit Science and Engineering, Tianjin University of Technology, No. 391, Binshuixi Road, Xiqing District, Tianjin, 300384, China.

<sup>2</sup> Tianjin Key Laboratory of Organic Solar Cells and Photochemical Conversion, School of Chemistry and Chemical Engineering, Tianjin University of Technology, No. 391, Binshuixi Road, Xiqing District, Tianjin, 300384, China.

<sup>3</sup> Department of Materials Science and Engineering and Inter-university Semiconductor Research Center, Seoul National University, Gwanak-ro 1, Daehag-dong, Gwanak-gu, Seoul, 08826, Republic of Korea.

\* Corresponding author's email address: jinshi58@163.com (Jin Shi Zhao) and cheolsh@snu.ac.kr (Cheol Seong Hwang)

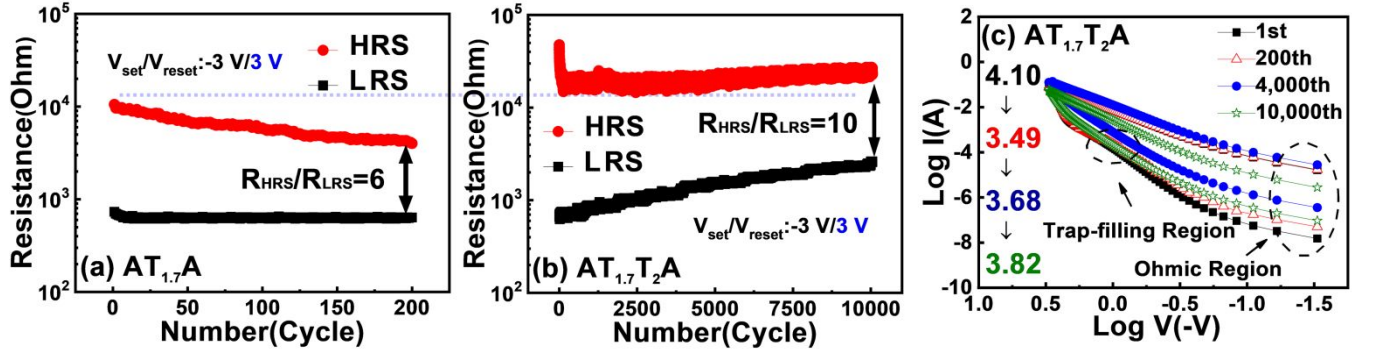

**Figure S1.** Endurance performance with  $V_{\text{set}}@-3\text{ V}$  and  $V_{\text{reset}}@3\text{ V}$  of the (a)  $\text{AT}_{1.7}\text{A}$  and (b)  $\text{AT}_{1.7}\text{T}_2\text{A}$  devices under I-V sweep. (c) SCLC fitting results from the double-log scale for different repetition cycles of the  $\text{AT}_{1.7}\text{T}_2\text{A}$  device.

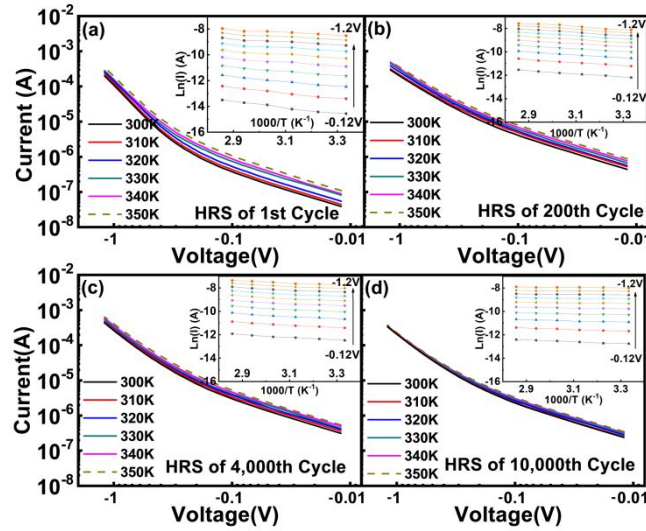

**Figure S2.** Electrical conduction behaviors in the narrow voltage bias region measured from 300K to 350 K. HRS of the sample after (a) the first, (b) 200th, (c) 4,000th, and (d) 10,000th I-V sweep. The inset figure shows the Arrhenius-type plots in the corresponding I-V curves, from which the activation energy ( $E_a$ )

could be estimated as a function of the applied voltage.

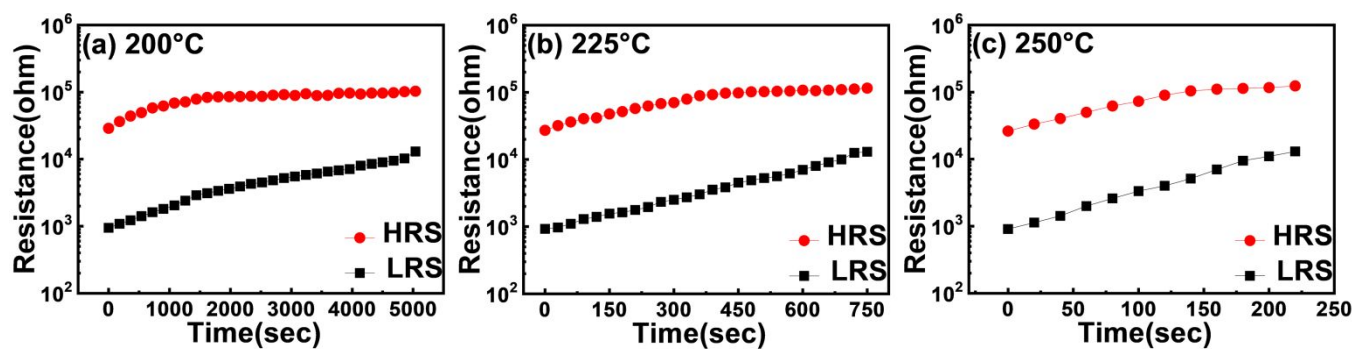

**Figure S3.** Retention test of the  $AT_{1.7}T_2A$  sample performed at (a) 200°C, (b) 225°C, and (c) 250°C, respectively.

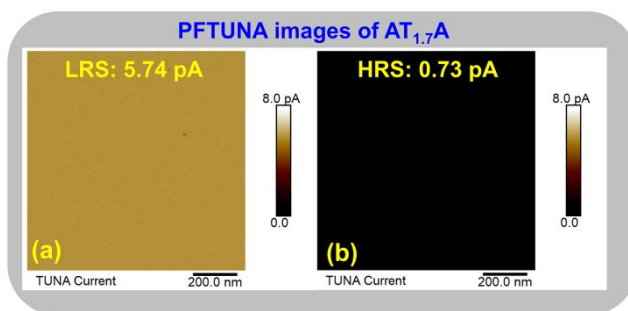

**Figure S4.** PFTUNA images of the  $AT_{1.7}A$  devices of (a) LRS before baking and (b) HRS before baking.

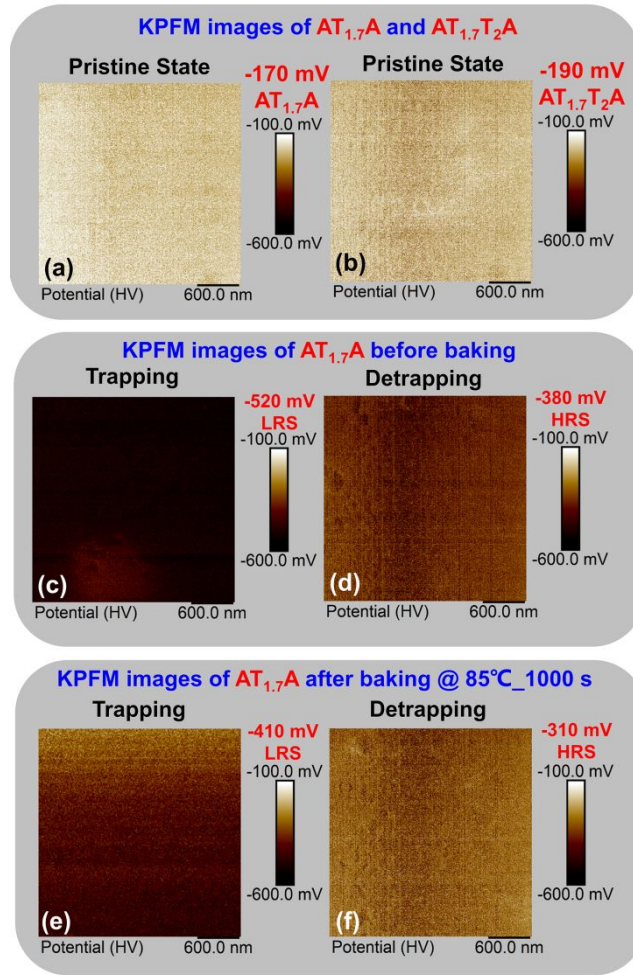

**Figure S5.** KPFM surface potential distribution images of the pristine states of the (a)  $AT_{1.7}A$  and (b)  $AT_{1.7}T_2A$  devices. KPFM results of the (c) electron-trapped (LRS) and (d) detrapped (HRS) states of the  $AT_{1.7}A$  structure. KPFM results of the (e) electron-trapped (LRS) and (f) detrapped (HRS) states of the  $AT_{1.7}A$  structure after baking for 1,000 s at 85°C.

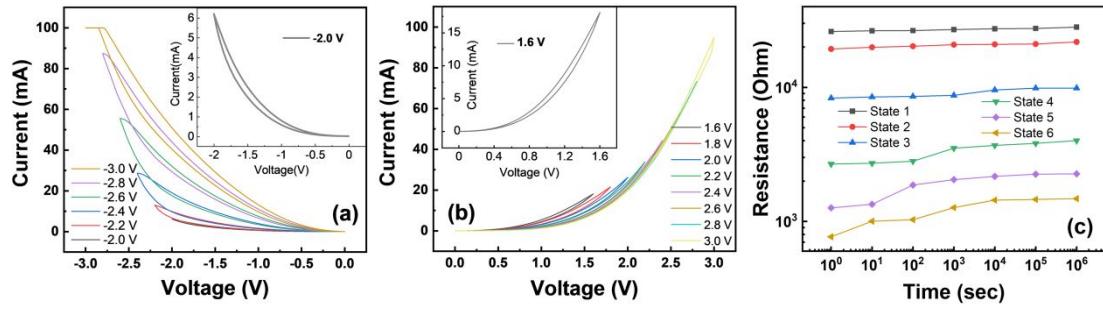

**Figure S6.** Multi-level current values of the  $AT_{1.7}T_2A$  structure (a) using the negative sweep mode for potentiation with an increasing (absolutely increasing) stop voltage (inset: -2 V stop voltage), (b) using the positive sweep mode for depression with an increasing stop voltage (inset: 1.6 V stop voltage) and (c) the retention of the multi-level states (read voltage was -0.1 V) achieved in (a) at room temperature.

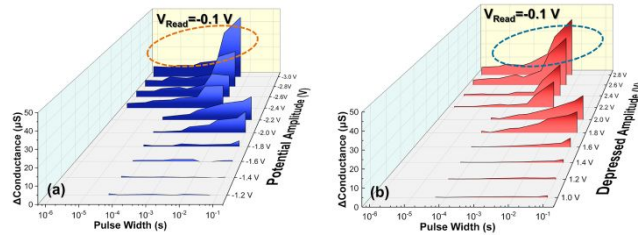

**Figure S7.** Measured conductance changes of the  $AT_{1.7}T_2A$  structure after application of different voltage pulse widths and voltage amplitudes. (a) Potentiation. (b) Depression.
